# Supplementary material for: Theoretical study on the optical and electronic properties of graphene quantum dots doped with heteroatoms
Source: Royal Society of Chemistry journal article supplement (doi:10.1039/c8cp01403e), 2018-01-01
Supplement: c8cp01403e1.pdf [file c8cp01403e1.pdf]

# Electronic Supporting Information

## Theoretical Study on Optical and Electronic Properties of Graphene Quantum Dots Doped with Heteroatoms

Jianguang Feng,<sup>a</sup> Hongzhou Dong,<sup>a</sup> Beili Pang,<sup>a</sup> Feifei Shao,<sup>a</sup> ChunKai Zhang,<sup>b</sup> Liyan Yu<sup>\*a</sup> and Lifeng Dong<sup>\*ac</sup>

<sup>a</sup> College of Materials Science and Engineering, Qingdao University of Science and Technology, Qingdao  
266042, China

<sup>b</sup> School of Computer Science and Technology, Harbin Institute of Technology

Shenzhen Graduate School, Shenzhen 518055, China

<sup>c</sup> Department of Physics, Hamline University, St. Paul 55104, USA

---

\*Corresponding authors: [donglifeng@qust.edu.cn](mailto:donglifeng@qust.edu.cn), [liyanyu@qust.edu.cn](mailto:liyanyu@qust.edu.cn), and [ldong03@hamline.edu](mailto:ldong03@hamline.edu).

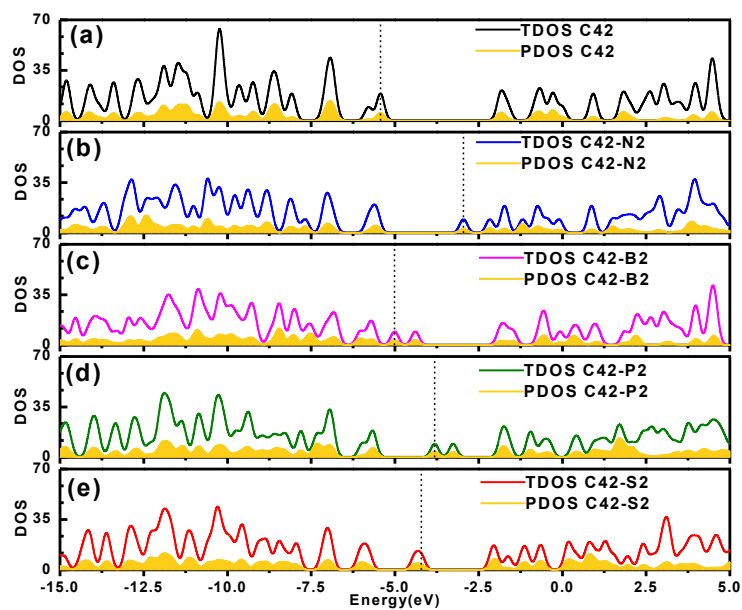

**Fig. S1** Density of state of pristine GQDs and doped GQDs. (a) pristine GQD, (b) C42-N2, (c) C42-B2, (d) C42-P2, and (e) C42-S2, respectively. The solid lines represent total DOS (TDOS). The yellow-filled regions represent partial DOS (PDOS) of two benzene rings in pristine GQDs for (a), and two five-member rings containing heteroatoms in doped GQDs for (b)-(e), respectively. (The vertical dashed line indicates the position of the HOMO level. The DOS is plotted with a Gaussian width of 0.01a.u.)

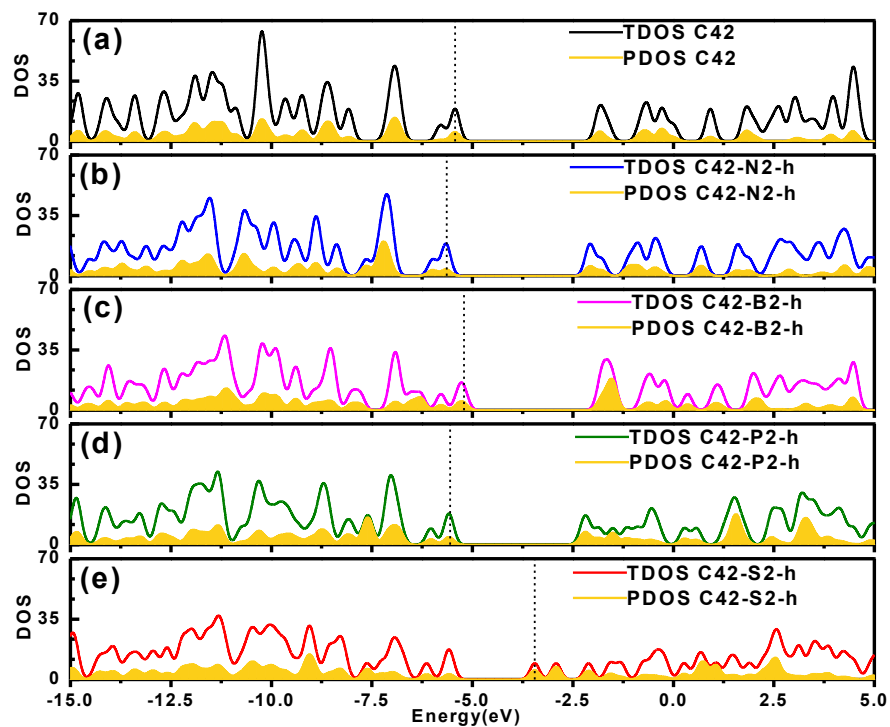

**Fig. S2** Density of state of pristine GODs and doped GQDs. (a) pristine GQD, (b) C42-N2-*h*, (c) C42-B2-*h*, (d) C42-P2-*h*, and (e) C42-S2-*h*, respectively.

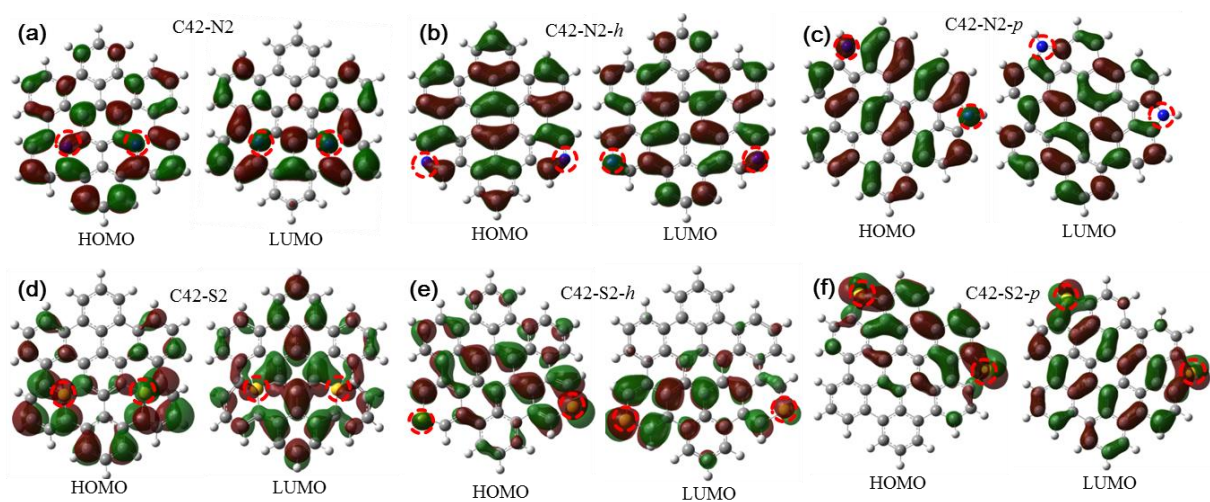

**Fig. S3** Isosurfaces of HOMO and LUMO in N- and S-doped GQDs with different patterns in ground state. The positive and negative orbital lobes are displayed in red and green colors, respectively.

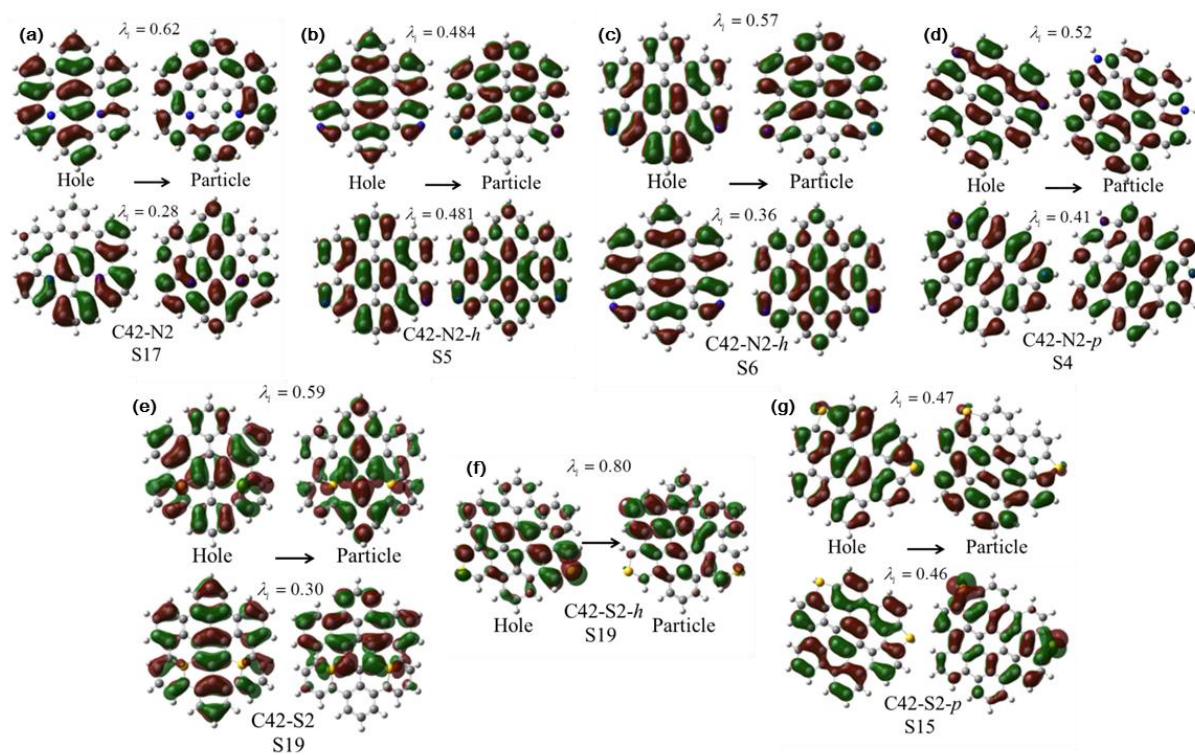

**Fig. S4** The NTO pairs for the prominent excited state of N- and S-doped GQDs. For this state the “hole” is on the left, and the “particle” is on the right; the values represent the associated eigenvalue ( $\lambda_i$ ).

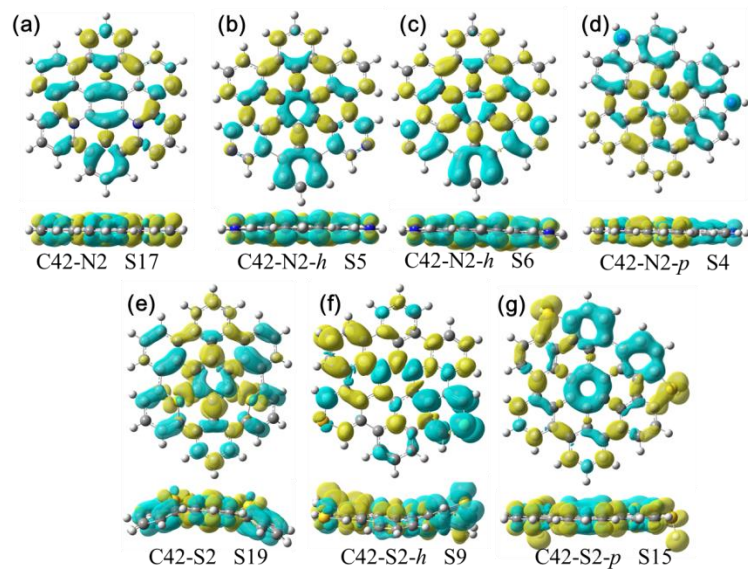

**Fig. S5** Representation of the charge difference density between the prominent excited state minus ground state for N- and S-doped GQDs. Lateral views are displayed at the bottom. (The blue and yellow colors represent hole and electron, respectively. The isovalue is  $4 \times 10^{-4}$ ).

**Table S1** The Cartesian Coordinates of stationary points for the optimized ground state geometry of C42

| C42 |           |           |           |
|-----|-----------|-----------|-----------|
|     | X         | Y         | Z         |
| C   | -2.842755 | 4.928235  | -0.00001  |
| C   | -2.860333 | 2.497661  | -0.000002 |
| C   | -3.537311 | 3.726867  | -0.000006 |
| C   | -4.995144 | 1.20438   | 0.000006  |
| C   | -2.87248  | 0.001412  | 0.000002  |
| C   | -3.591933 | 1.231772  | 0.000002  |
| C   | -4.996326 | -1.19947  | 0.000008  |
| C   | -2.862787 | -2.494848 | 0.000003  |
| C   | -3.593142 | -1.228241 | 0.000005  |
| C   | -2.847598 | -4.925439 | 0.000004  |
| C   | -3.540973 | -3.723388 | 0.000005  |
| C   | 1.459587  | 4.926826  | -0.000005 |
| C   | -1.455133 | 4.928031  | -0.000009 |
| C   | -0.728918 | 3.726704  | -0.000006 |
| C   | 1.43755   | 2.486983  | 0         |
| C   | 0.732694  | 3.726147  | -0.000004 |
| C   | -1.434999 | 2.488437  | -0.000003 |
| C   | -0.711403 | 1.233826  | -0.000001 |
| C   | 1.424431  | -0.0007   | 0.000001  |
| C   | 0.71288   | 1.233274  | 0         |
| C   | -1.423917 | 0.0007    | 0         |
| C   | -0.712615 | -1.233127 | 0         |
| C   | 1.435104  | -2.488395 | -0.000002 |
| C   | 0.711667  | -1.233974 | 0         |
| C   | -1.437444 | -2.487025 | 0         |
| C   | -0.732581 | -3.725986 | -0.000002 |
| C   | 1.454743  | -4.928258 | -0.000014 |
| C   | 0.729031  | -3.726865 | -0.000006 |
| C   | -1.459977 | -4.926599 | 0.000001  |
| C   | 3.54058   | 3.723962  | 0.000004  |
| C   | 2.863012  | 2.494718  | 0.000004  |
| C   | 3.59332   | 1.228491  | 0.000006  |
| C   | 5.689564  | -0.002796 | 0.000012  |
| C   | 4.996596  | 1.199305  | 0.000011  |
| C   | 2.872524  | -0.001412 | 0.000003  |
| C   | 3.59211   | -1.232022 | 0.000003  |
| C   | 4.995415  | -1.204215 | 0.000008  |
| C   | 2.860559  | -2.49753  | -0.000002 |
| C   | 3.536917  | -3.727441 | -0.000007 |
| H   | -4.619123 | 3.760836  | -0.000006 |
| H   | -5.564785 | 2.124754  | 0.000006  |
| H   | -5.56687  | -2.119283 | 0.000011  |
| H   | -4.622818 | -3.756294 | 0.000007  |
| C   | -5.689425 | 0.002796  | 0.000009  |
| H   | -6.775459 | 0.00333   | 0.000012  |
| C   | 2.842247  | -4.92863  | -0.000014 |
| C   | 2.847091  | 4.925834  | -0.000001 |
| H   | -3.38568  | 5.868839  | -0.000013 |
| H   | -0.943163 | 5.881537  | -0.000012 |
| H   | 0.948606  | 5.880843  | -0.000009 |
| H   | 3.390482  | 5.866183  | -0.000001 |
| H   | 4.622261  | 3.757177  | 0.000007  |
| H   | 5.567361  | 2.118782  | 0.000013  |
| H   | 6.775623  | -0.00333  | 0.000015  |
| H   | 5.565276  | -2.124252 | 0.000008  |
| H   | 4.618565  | -3.761719 | -0.000007 |
| H   | 3.384714  | -5.869513 | -0.000002 |
| H   | 0.942825  | -5.881773 | -0.000002 |
| H   | -0.948944 | -5.880607 | 0.000001  |
| H   | -3.391448 | -5.865508 | 0.000006  |











**Table S6** Absorption energy, wavelengths, and oscillator strengths for the first 20 singlet states. The values were obtained using B3LYP/6-31G\* for the optimized ground state geometry. Water was taken into account as a solvent by using the polarizable continuum model.

|          | Singlet states | Absorption energy (eV) | Wavelength (nm) | Oscillator strengths( $f$ ) |
|----------|----------------|------------------------|-----------------|-----------------------------|
|          | 1              | 2.90                   | 428.24          | 0.0000                      |
|          | 2              | 3.03                   | 409.46          | 0.0000                      |
|          | 3              | 3.31                   | 374.98          | 0.0000                      |
|          | 4              | 3.31                   | 374.96          | 0.0000                      |
|          | 5              | 3.41                   | 363.51          | 1.0023                      |
| Pristine | 6              | 3.41                   | 363.50          | 1.0018                      |
| GQD      | 7              | 3.58                   | 346.24          | 0.0000                      |
|          | 8              | 3.58                   | 346.23          | 0.0000                      |
|          | 9              | 3.82                   | 324.80          | 0.0000                      |
|          | 10             | 3.97                   | 312.32          | 0.0000                      |
|          | 11             | 3.97                   | 312.31          | 0.0000                      |
|          | 12             | 4.16                   | 298.25          | 0.0002                      |
|          | 13             | 4.16                   | 298.24          | 0.0002                      |
|          | 14             | 4.23                   | 293.26          | 0.0000                      |
|          | 15             | 4.29                   | 289.22          | 0.0000                      |
|          | 16             | 4.31                   | 287.52          | 0.0000                      |
|          | 17             | 4.37                   | 283.69          | 0.0008                      |
|          | 18             | 4.37                   | 283.68          | 0.0008                      |
|          | 19             | 4.42                   | 280.38          | 0.0000                      |
|          | 20             | 4.42                   | 280.38          | 0.0000                      |

**Table S7** Absorption energy, wavelengths, and oscillator strengths for the first 20 singlet states of C42-N2.

|        | Singlet states | Absorption energy (eV) | Wavelength (nm) | Oscillator strengths( $f$ ) |
|--------|----------------|------------------------|-----------------|-----------------------------|
| C42-N2 | 1              | 0.27                   | 4559.16         | 0.0054                      |
|        | 2              | 0.69                   | 1789.30         | 0.0258                      |
|        | 3              | 0.84                   | 1479.22         | 0.0573                      |
|        | 4              | 1.30                   | 948.82          | 0.1754                      |
|        | 5              | 1.65                   | 753.04          | 0.0103                      |
|        | 6              | 1.82                   | 681.50          | 0.0013                      |
|        | 7              | 2.01                   | 617.87          | 0.0552                      |
|        | 8              | 2.38                   | 520.74          | 0.1736                      |
|        | 9              | 2.77                   | 447.50          | 0.0839                      |
|        | 10             | 2.96                   | 418.90          | 0.1054                      |
|        | 11             | 3.11                   | 399.09          | 0.0752                      |
|        | 12             | 3.28                   | 377.91          | 0.1016                      |
|        | 13             | 3.30                   | 375.19          | 0.0043                      |
|        | 14             | 3.33                   | 372.13          | 0.0588                      |
|        | 15             | 3.39                   | 365.36          | 0.1286                      |
|        | 16             | 3.45                   | 359.72          | 0.2155                      |
|        | 17             | 3.45                   | 359.29          | 0.2304                      |
|        | 18             | 3.63                   | 341.85          | 0.0006                      |
|        | 19             | 3.74                   | 331.17          | 0.0310                      |
|        | 20             | 3.83                   | 323.39          | 0.0909                      |

**Table S8** Absorption energy, wavelengths, and oscillator strengths for the first 20 singlet states of C42-N2-*h*.

|                  | Singlet states | Absorption energy (eV) | Wavelength (nm) | Oscillator strengths( <i>f</i> ) |
|------------------|----------------|------------------------|-----------------|----------------------------------|
| C42-N2- <i>h</i> | 1              | 2.89                   | 428.87          | 0.0070                           |
|                  | 2              | 3.01                   | 411.92          | 0.0006                           |
|                  | 3              | 3.32                   | 373.70          | 0.1899                           |
|                  | 4              | 3.33                   | 372.72          | 0.1253                           |
|                  | 5              | 3.41                   | 363.43          | 0.7655                           |
|                  | 6              | 3.43                   | 361.85          | 0.7799                           |
|                  | 7              | 3.56                   | 348.08          | 0.0013                           |
|                  | 8              | 3.58                   | 345.92          | 0.0146                           |
|                  | 9              | 3.86                   | 321.44          | 0.0001                           |
|                  | 10             | 3.93                   | 315.85          | 0.0083                           |
|                  | 11             | 3.95                   | 314.01          | 0.0117                           |
|                  | 12             | 4.14                   | 299.73          | 0.0058                           |
|                  | 13             | 4.18                   | 296.37          | 0.0029                           |
|                  | 14             | 4.22                   | 294.05          | 0.0023                           |
|                  | 15             | 5.24                   | 291.69          | 0.0005                           |
|                  | 16             | 4.28                   | 289.89          | 0.0004                           |
|                  | 17             | 4.30                   | 288.46          | 0.0000                           |
|                  | 18             | 4.31                   | 287.61          | 0.0068                           |
|                  | 19             | 4.31                   | 287.45          | 0.0295                           |
|                  | 20             | 4.35                   | 285.23          | 0.0085                           |

**Table S9** Absorption energy, wavelengths, and oscillator strengths for the first 20 singlet states of C42-N2-*p*.

|                  | Singlet states | Absorption energy (eV) | Wavelength (nm) | Oscillator strengths( <i>f</i> ) |
|------------------|----------------|------------------------|-----------------|----------------------------------|
| C42-N2- <i>p</i> | 1              | 2.76                   | 449.85          | 0.0023                           |
|                  | 2              | 2.79                   | 444.54          | 0.1089                           |
|                  | 3              | 3.26                   | 380.86          | 0.6370                           |
|                  | 4              | 3.26                   | 380.79          | 0.9164                           |
|                  | 5              | 3.37                   | 367.40          | 0.0728                           |
|                  | 6              | 3.57                   | 347.08          | 0.0280                           |
|                  | 7              | 3.61                   | 343.60          | 0.0753                           |
|                  | 8              | 3.72                   | 333.30          | 0.0115                           |
|                  | 9              | 3.79                   | 326.95          | 0.0745                           |
|                  | 10             | 3.83                   | 323.39          | 0.0603                           |
|                  | 11             | 3.96                   | 312.99          | 0.0001                           |
|                  | 12             | 3.97                   | 312.25          | 0.0568                           |
|                  | 13             | 4.07                   | 304.66          | 0.0007                           |
|                  | 14             | 4.10                   | 303.01          | 0.0344                           |
|                  | 15             | 4.16                   | 297.74          | 0.0056                           |
|                  | 16             | 4.23                   | 293.02          | 0.0233                           |
|                  | 17             | 4.24                   | 292.62          | 0.0464                           |
|                  | 18             | 4.28                   | 289.58          | 0.0383                           |
|                  | 19             | 4.30                   | 288.66          | 0.0654                           |
|                  | 20             | 4.34                   | 285.50          | 0.0054                           |

**Table S10** Absorption energy, wavelengths, and oscillator strengths for the first 20 singlet states of C42-B2.

|        | Singlet states | Absorption energy (eV) | Wavelength (nm) | Oscillator strengths( $f$ ) |
|--------|----------------|------------------------|-----------------|-----------------------------|
|        | 1              | 0.1014                 | 12222.99        | 0.0009                      |
|        | 2              | 0.8069                 | 1536.51         | 0.0070                      |
|        | 3              | 0.9953                 | 1245.71         | 0.0488                      |
|        | 4              | 1.17                   | 1063.32         | 0.2017                      |
|        | 5              | 1.90                   | 653.57          | 0.0159                      |
|        | 6              | 1.98                   | 627.20          | 0.0210                      |
|        | 7              | 2.12                   | 585.80          | 0.1311                      |
|        | 8              | 2.20                   | 564.00          | 0.0298                      |
|        | 9              | 2.28                   | 544.57          | 0.0000                      |
| C42-B2 | 10             | 2.48                   | 499.11          | 0.0000                      |
|        | 11             | 2.71                   | 457.48          | 0.3605                      |
|        | 12             | 2.88                   | 431.25          | 0.0238                      |
|        | 13             | 2.90                   | 428.14          | 0.0000                      |
|        | 14             | 3.00                   | 413.95          | 0.0034                      |
|        | 15             | 3.09                   | 401.04          | 0.1246                      |
|        | 16             | 3.18                   | 389.58          | 0.0265                      |
|        | 17             | 3.30                   | 375.95          | 0.0001                      |
|        | 18             | 3.33                   | 372.22          | 0.0695                      |
|        | 19             | 3.41                   | 363.90          | 0.2014                      |
|        | 20             | 3.46                   | 358.18          | 0.0170                      |



**Table S11** Absorption energy, wavelengths, and oscillator strengths for the first 20 singlet states of C42-B2-*h*.

|                  | Singlet states | Absorption energy (eV) | Wavelength (nm) | Oscillator strengths( <i>f</i> ) |
|------------------|----------------|------------------------|-----------------|----------------------------------|
|                  | 1              | 2.82                   | 439.04          | 0.0421                           |
|                  | 2              | 2.90                   | 428.16          | 0.0000                           |
|                  | 3              | 2.93                   | 423.11          | 0.0029                           |
|                  | 4              | 2.93                   | 422.49          | 0.0024                           |
|                  | 5              | 3.08                   | 403.17          | 0.0059                           |
|                  | 6              | 3.09                   | 401.15          | 0.0000                           |
|                  | 7              | 3.12                   | 397.83          | 0.0000                           |
|                  | 8              | 3.16                   | 392.01          | 0.0631                           |
|                  | 9              | 3.30                   | 375.34          | 0.8771                           |
| C42-B2- <i>h</i> | 10             | 3.33                   | 372.27          | 0.7529                           |
|                  | 11             | 3.56                   | 347.86          | 0.0042                           |
|                  | 12             | 3.64                   | 340.23          | 0.0013                           |
|                  | 13             | 3.67                   | 338.13          | 0.0000                           |
|                  | 14             | 3.71                   | 333.81          | 0.0002                           |
|                  | 15             | 3.75                   | 330.52          | 0.0001                           |
|                  | 16             | 3.85                   | 321.98          | 0.0115                           |
|                  | 17             | 3.92                   | 316.21          | 0.0023                           |
|                  | 18             | 3.94                   | 315.01          | 0.0052                           |
|                  | 19             | 3.95                   | 314.22          | 0.0000                           |
|                  | 20             | 3.98                   | 311.39          | 0.0104                           |

**Table S12** Absorption energy, wavelengths, and oscillator strengths for the first 20 singlet states of C42-B2-*p*.

|                  | Singlet states | Absorption energy (eV) | Wavelength (nm) | Oscillator strengths( <i>f</i> ) |
|------------------|----------------|------------------------|-----------------|----------------------------------|
|                  | 1              | 1.95                   | 635.71          | 0.0002                           |
|                  | 2              | 2.08                   | 596.84          | 0.0070                           |
|                  | 3              | 2.33                   | 531.67          | 0.0153                           |
|                  | 4              | 2.49                   | 497.67          | 0.0171                           |
|                  | 5              | 2.56                   | 484.53          | 0.1902                           |
|                  | 6              | 2.79                   | 443.83          | 0.0538                           |
|                  | 7              | 3.19                   | 389.20          | 0.2709                           |
|                  | 8              | 3.25                   | 381.85          | 0.0824                           |
|                  | 9              | 3.29                   | 376.69          | 0.0001                           |
| C42-B2- <i>p</i> | 10             | 3.41                   | 363.68          | 0.0014                           |
|                  | 11             | 3.46                   | 358.28          | 0.0000                           |
|                  | 12             | 3.49                   | 355.63          | 0.0775                           |
|                  | 13             | 3.50                   | 354.57          | 0.0030                           |
|                  | 14             | 3.65                   | 340.03          | 0.4067                           |
|                  | 15             | 3.69                   | 336.10          | 0.0027                           |
|                  | 16             | 3.73                   | 332.13          | 0.4369                           |
|                  | 17             | 3.79                   | 327.52          | 0.0015                           |
|                  | 18             | 3.81                   | 325.43          | 0.0020                           |
|                  | 19             | 3.83                   | 323.55          | 0.0842                           |
|                  | 20             | 3.84                   | 322.63          | 0.6276                           |

**Table S13** Absorption energy, wavelengths, and oscillator strengths for the first 20 singlet states of C42-P2.

|        | Singlet states | Absorption energy (eV) | Wavelength (nm) | Oscillator strengths( $f$ ) |
|--------|----------------|------------------------|-----------------|-----------------------------|
|        | 1              | 0.34                   | 3697.24         | 0.0288                      |
|        | 2              | 1.41                   | 881.49          | 0.0079                      |
|        | 3              | 1.43                   | 867.11          | 0.0016                      |
|        | 4              | 1.63                   | 759.29          | 0.0274                      |
|        | 5              | 1.84                   | 672.12          | 0.0312                      |
|        | 6              | 1.87                   | 664.77          | 0.0090                      |
|        | 7              | 2.21                   | 562.06          | 0.0068                      |
|        | 8              | 2.28                   | 542.91          | 0.0207                      |
|        | 9              | 2.40                   | 515.80          | 0.1793                      |
| C42-P2 | 10             | 2.72                   | 455.79          | 0.0151                      |
|        | 11             | 2.89                   | 429.05          | 0.0021                      |
|        | 12             | 3.09                   | 401.33          | 0.0048                      |
|        | 13             | 3.14                   | 395.10          | 0.0048                      |
|        | 14             | 3.16                   | 392.74          | 0.0078                      |
|        | 15             | 3.16                   | 392.30          | 0.0100                      |
|        | 16             | 3.23                   | 384.21          | 0.0026                      |
|        | 17             | 3.30                   | 376.54          | 0.0052                      |
|        | 18             | 3.48                   | 355.90          | 0.0434                      |
|        | 19             | 3.51                   | 352.93          | 0.0551                      |
|        | 20             | 3.54                   | 350.65          | 0.0980                      |

**Table S14** Absorption energy, wavelengths, and oscillator strengths for the first 20 singlet states of C42-P2-*h*.

|                  | Singlet states | Absorption energy (eV) | Wavelength (nm) | Oscillator strengths( <i>f</i> ) |
|------------------|----------------|------------------------|-----------------|----------------------------------|
|                  | 1              | 2.73                   | 453.90          | 0.0010                           |
|                  | 2              | 2.83                   | 438.81          | 0.0521                           |
|                  | 3              | 3.16                   | 391.82          | 0.1902                           |
|                  | 4              | 3.17                   | 391.41          | 0.7924                           |
|                  | 5              | 3.21                   | 385.77          | 0.5377                           |
|                  | 6              | 3.26                   | 380.31          | 0.0888                           |
|                  | 7              | 3.42                   | 362.48          | 0.0488                           |
|                  | 8              | 3.48                   | 356.07          | 0.0797                           |
|                  | 9              | 3.56                   | 348.41          | 0.0298                           |
| C42-P2- <i>h</i> | 10             | 3.59                   | 345.32          | 0.1504                           |
|                  | 11             | 3.81                   | 325.25          | 0.0074                           |
|                  | 12             | 3.89                   | 318.90          | 0.0195                           |
|                  | 13             | 3.91                   | 317.39          | 0.0162                           |
|                  | 14             | 3.99                   | 310.92          | 0.0204                           |
|                  | 15             | 4.02                   | 308.37          | 0.0423                           |
|                  | 16             | 4.08                   | 303.63          | 0.0315                           |
|                  | 17             | 4.13                   | 300.56          | 0.0434                           |
|                  | 18             | 4.15                   | 298.68          | 0.0006                           |
|                  | 19             | 4.20                   | 294.71          | 0.0030                           |
|                  | 20             | 4.22                   | 293.47          | 0.0257                           |

**Table S15** Absorption energy, wavelengths, and oscillator strengths for the first 20 singlet states of C42-P2-*p*.

|                  | Singlet states | Absorption energy (eV) | Wavelength (nm) | Oscillator strengths( <i>f</i> ) |
|------------------|----------------|------------------------|-----------------|----------------------------------|
| C42-P2- <i>p</i> | 1              | 2.48                   | 499.13          | 0.1840                           |
|                  | 2              | 2.57                   | 483.25          | 0.0479                           |
|                  | 3              | 2.99                   | 414.49          | 0.5699                           |
|                  | 4              | 3.05                   | 406.38          | 0.3999                           |
|                  | 5              | 3.08                   | 403.17          | 0.0445                           |
|                  | 6              | 3.42                   | 362.15          | 0.0684                           |
|                  | 7              | 3.47                   | 357.73          | 0.0150                           |
|                  | 8              | 3.47                   | 357.35          | 0.0504                           |
|                  | 9              | 3.51                   | 353.44          | 0.0147                           |
|                  | 10             | 3.61                   | 343.51          | 0.0605                           |
|                  | 11             | 3.72                   | 333.64          | 0.1679                           |
|                  | 12             | 3.73                   | 332.58          | 0.1707                           |
|                  | 13             | 3.76                   | 330.18          | 0.0031                           |
|                  | 14             | 3.80                   | 326.29          | 0.4717                           |
|                  | 15             | 3.86                   | 321.46          | 0.0001                           |
|                  | 16             | 3.87                   | 320.03          | 0.0433                           |
|                  | 17             | 3.88                   | 319.18          | 0.1448                           |
|                  | 18             | 4.01                   | 309.17          | 0.0535                           |
|                  | 19             | 4.10                   | 301.98          | 0.1140                           |
|                  | 20             | 4.14                   | 299.05          | 0.0522                           |

**Table S16** Absorption energy, wavelengths, and oscillator strengths for the first 20 singlet states of C42-S2.

|        | Singlet states | Absorption energy (eV) | Wavelength (nm) | Oscillator strengths( $f$ ) |
|--------|----------------|------------------------|-----------------|-----------------------------|
|        | 1              | 1.47                   | 844.13          | 0.0297                      |
|        | 2              | 1.63                   | 760.03          | 0.0213                      |
|        | 3              | 1.68                   | 738.80          | 0.0204                      |
|        | 4              | 1.77                   | 699.56          | 0.0192                      |
|        | 5              | 2.12                   | 583.80          | 0.1320                      |
|        | 6              | 2.16                   | 572.69          | 0.0547                      |
|        | 7              | 2.47                   | 501.53          | 0.0026                      |
|        | 8              | 2.62                   | 473.47          | 0.0270                      |
|        | 9              | 2.64                   | 470.34          | 0.0082                      |
| C42-S2 | 10             | 2.73                   | 454.10          | 0.0002                      |
|        | 11             | 2.96                   | 419.48          | 0.0028                      |
|        | 12             | 3.08                   | 402.59          | 0.0080                      |
|        | 13             | 3.09                   | 401.46          | 0.0353                      |
|        | 14             | 3.11                   | 399.30          | 0.0000                      |
|        | 15             | 3.17                   | 390.68          | 0.1011                      |
|        | 16             | 3.29                   | 377.21          | 0.0350                      |
|        | 17             | 3.34                   | 371.70          | 0.0344                      |
|        | 18             | 3.44                   | 359.92          | 0.1676                      |
|        | 19             | 3.51                   | 353.13          | 0.3884                      |
|        | 20             | 3.84                   | 350.38          | 0.1874                      |

**Table S17** Absorption energy, wavelengths, and oscillator strengths for the first 20 singlet states of C42-S2-*h*.

|                  | Singlet states | Absorption energy (eV) | Wavelength (nm) | Oscillator strengths( <i>f</i> ) |
|------------------|----------------|------------------------|-----------------|----------------------------------|
|                  | 1              | 0.12                   | 10649.67        | 0.0017                           |
|                  | 2              | 1.00                   | 1245.55         | 0.0703                           |
|                  | 3              | 1.33                   | 931.98          | 0.0580                           |
|                  | 4              | 1.72                   | 719.56          | 0.0768                           |
|                  | 5              | 2.10                   | 592.90          | 0.0014                           |
|                  | 6              | 2.21                   | 562.27          | 0.0708                           |
|                  | 7              | 2.28                   | 544.26          | 0.1024                           |
|                  | 8              | 2.50                   | 495.48          | 0.0691                           |
|                  | 9              | 2.59                   | 478.20          | 0.4259                           |
| C42-S2- <i>h</i> | 10             | 2.63                   | 470.59          | 0.0181                           |
|                  | 11             | 2.78                   | 446.70          | 0.0586                           |
|                  | 12             | 2.98                   | 416.52          | 0.0642                           |
|                  | 13             | 3.07                   | 403.05          | 0.0980                           |
|                  | 14             | 3.20                   | 387.89          | 0.0117                           |
|                  | 15             | 3.29                   | 376.77          | 0.0153                           |
|                  | 16             | 3.39                   | 365.86          | 0.0033                           |
|                  | 17             | 3.46                   | 358.03          | 0.0128                           |
|                  | 18             | 3.48                   | 356.21          | 0.1026                           |
|                  | 19             | 3.5194                 | 352.29          | 0.0176                           |
|                  | 20             | 3.6009                 | 344.32          | 0.1500                           |

**Table S18** Absorption energy, wavelengths, and oscillator strengths for the first 20 singlet states of C42-S2-*p*.

|                  | Singlet states | Absorption energy (eV) | Wavelength (nm) | Oscillator strengths( <i>f</i> ) |
|------------------|----------------|------------------------|-----------------|----------------------------------|
| C42-S2- <i>p</i> | 1              | 0.65                   | 1893.77         | 0.0590                           |
|                  | 2              | 0.71                   | 1740.58         | 0.0036                           |
|                  | 3              | 1.48                   | 839.03          | 0.0204                           |
|                  | 4              | 1.60                   | 775.68          | 0.3044                           |
|                  | 5              | 1.82                   | 682.88          | 0.0334                           |
|                  | 6              | 1.93                   | 643.96          | 0.0139                           |
|                  | 7              | 2.05                   | 606.06          | 0.0071                           |
|                  | 8              | 2.15                   | 575.84          | 0.0269                           |
|                  | 9              | 2.21                   | 559.88          | 0.0737                           |
|                  | 10             | 2.50                   | 495.32          | 0.0385                           |
|                  | 11             | 2.71                   | 457.11          | 0.1080                           |
|                  | 12             | 2.77                   | 447.63          | 0.1286                           |
|                  | 13             | 2.94                   | 421.74          | 0.0437                           |
|                  | 14             | 3.12                   | 397.51          | 0.0101                           |
|                  | 15             | 3.14                   | 395.43          | 0.6457                           |
|                  | 16             | 3.20                   | 388.41          | 0.2987                           |
|                  | 17             | 3.44                   | 360.05          | 0.2484                           |
|                  | 18             | 3.58                   | 346.52          | 0.0003                           |
|                  | 19             | 3.62                   | 342.19          | 0.0301                           |
|                  | 20             | 3.67                   | 337.56          | 0.0171                           |



**Table S19** Excitation energies, wavelengths, oscillator strengths, transition coefficients, and associated eigenvalues of the prominent excitation in N- and S-doped GQDs.

| GQDs             | Dominant Excitation | Excitation energy(eV) | Wavelength (nm) | Oscillator strength( $f$ ) | Transition coefficients | Associated eigenvalues( $\lambda_i$ ) |
|------------------|---------------------|-----------------------|-----------------|----------------------------|-------------------------|---------------------------------------|
| C42-N2           | S17                 | 3.45                  | 359.29          | 0.23                       | H-3→L+2 -0.29           | 0.62                                  |
|                  |                     |                       |                 |                            | H-2→L+1 0.53            | 0.28                                  |
|                  |                     |                       |                 |                            | H-1→L+2 -0.27           |                                       |
| C42-N2- <i>h</i> | S5                  | 3.41                  | 363.43          | 0.77                       | H-1→L+1 0.47            |                                       |
|                  |                     |                       |                 |                            | H→L 0.39                | 0.48                                  |
|                  |                     |                       |                 |                            | H →L+2 0.30             | 0.48                                  |
|                  | S6                  | 3.43                  | 361.85          | 0.78                       | H-2→L 0.29              |                                       |
|                  |                     |                       |                 |                            | H-1→L -0.38             | 0.57                                  |
|                  |                     |                       |                 |                            | H-1→L+2 -0.28           | 0.36                                  |
| C42-N2- <i>p</i> | S4                  | 3.26                  | 380.79          | 0.92                       | H→L+1 0.42              |                                       |
|                  |                     |                       |                 |                            | H-1→L 0.51              | 0.52                                  |
|                  |                     |                       |                 |                            | H→L+1 -0.45             | 0.41                                  |
| C42-S2           | 19                  | 3.51                  | 353.13          | 0.39                       | H-4→L 0.50              | 0.59                                  |
|                  |                     |                       |                 |                            | H-2→L+1 -0.37           | 0.30                                  |
| C42-S2- <i>h</i> | 9                   | 2.59                  | 478.20          | 0.43                       | H →L+5 0.60             | 0.80                                  |
| C42-S2- <i>p</i> | 15                  | 3.14                  | 395.43          | 0.65                       | H-2→L -0.47             | 0.47                                  |
|                  |                     |                       |                 |                            | H-1→L+1 0.49            | 0.46                                  |
